# Supplementary material
Source: publisher figshare collection journal article supplement (https://springernature.figshare.com/ndownloader/files/13645478)

**Figure S5. The modified collection cage used with NG2G traps in this study.** The cage was made of a 1 L plastic water bottle at the top of the trap. The bottle contained 95% ethanol, was placed around 45° angle above the net and was fixed to the metallic structure of the trap with a string.

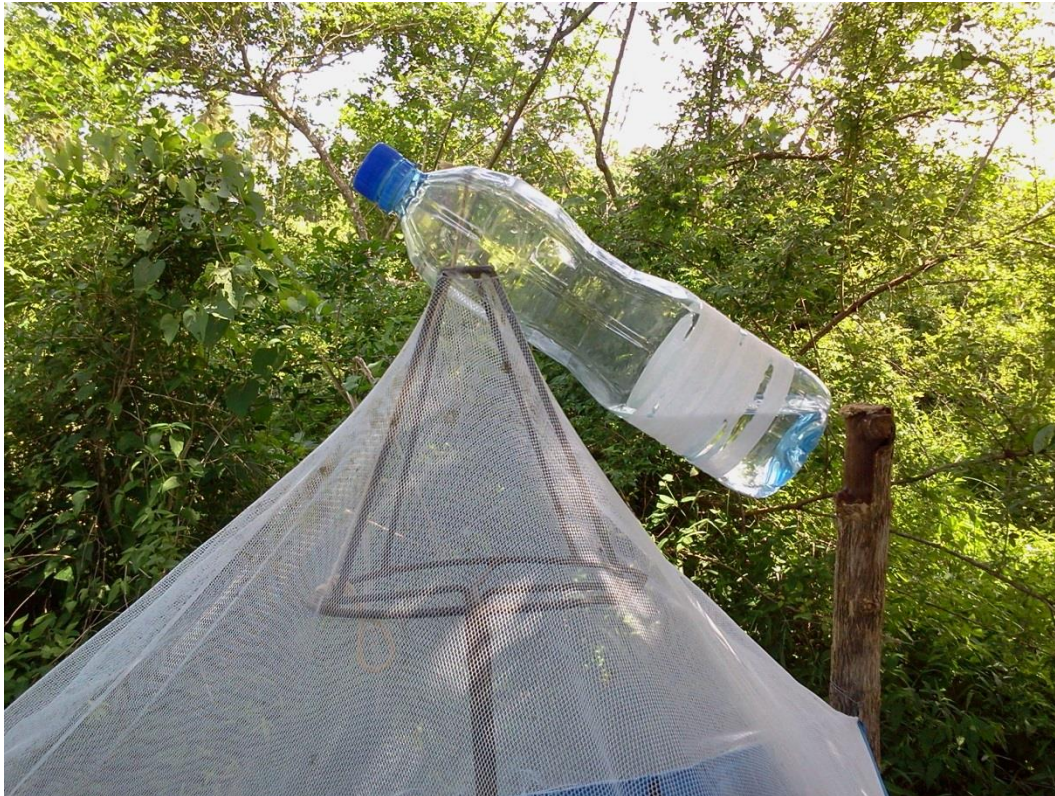

Supplement: Supplementary file [file 13645478]
